# Supplementary material for: Pore-tuning to boost the electrocatalytic activity of polymeric micelle-templated mesoporous Pd nanoparticles
Source: PubMed Central journal article supplement (PMC6457336; doi:10.1039/c8sc03911a), 2019-03-12
Supplement: SC-010-C8SC03911A-s001.pdf [file SC-010-C8SC03911A-s001.pdf]

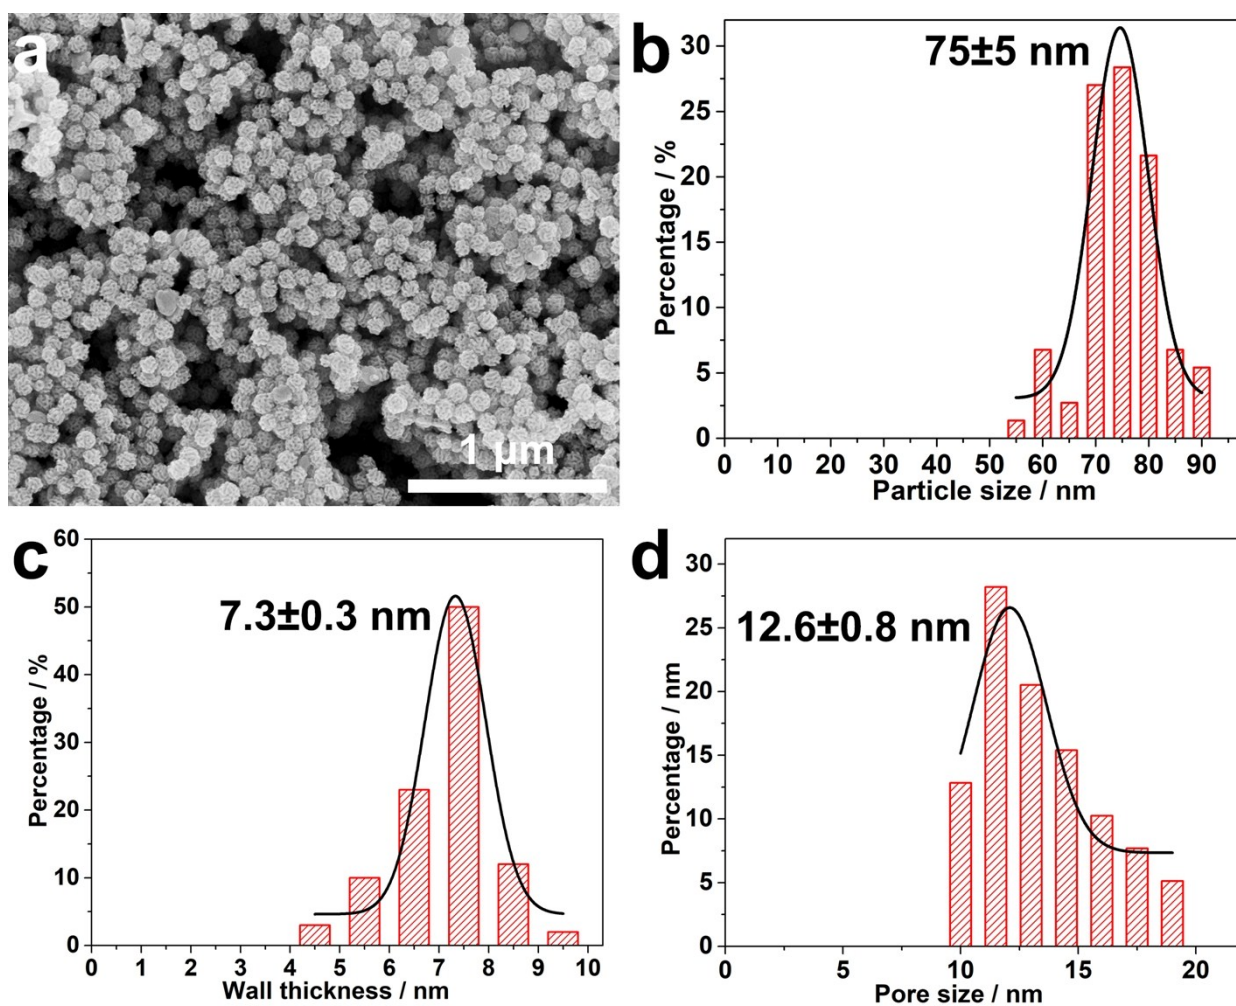

**Figure S1.** (a) Low-magnification SEM image of meso-PdNPs-4%. The histograms of (b) particle size, (c) wall thickness, and (d) pore size distributions of meso-PdNPs-4%.

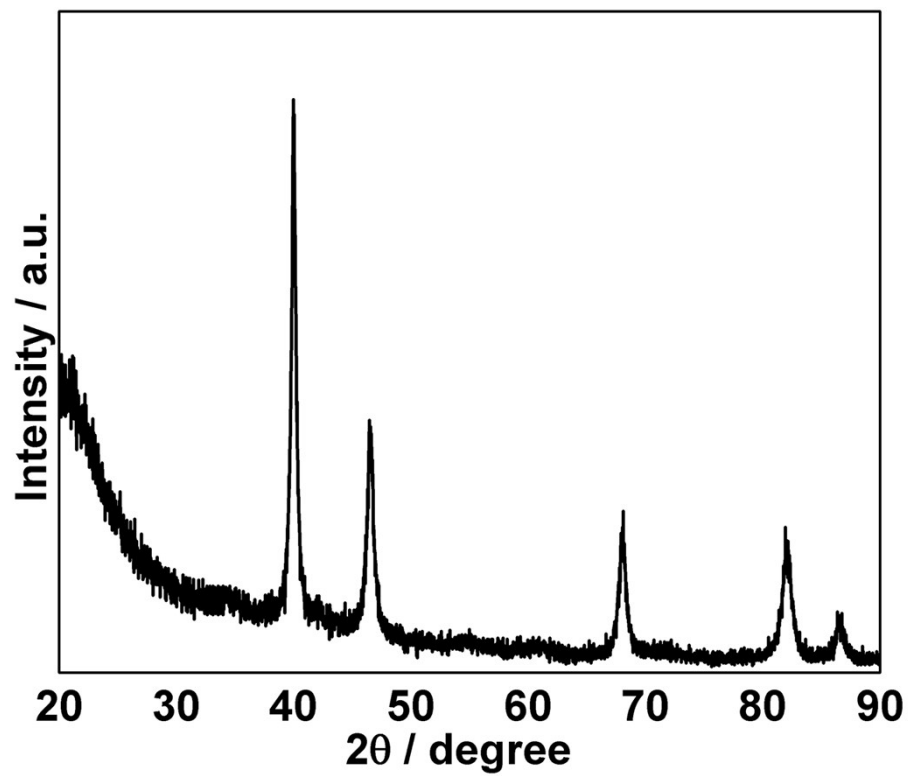

**Figure S2.** XRD pattern of the meso-PdNPs-4%.

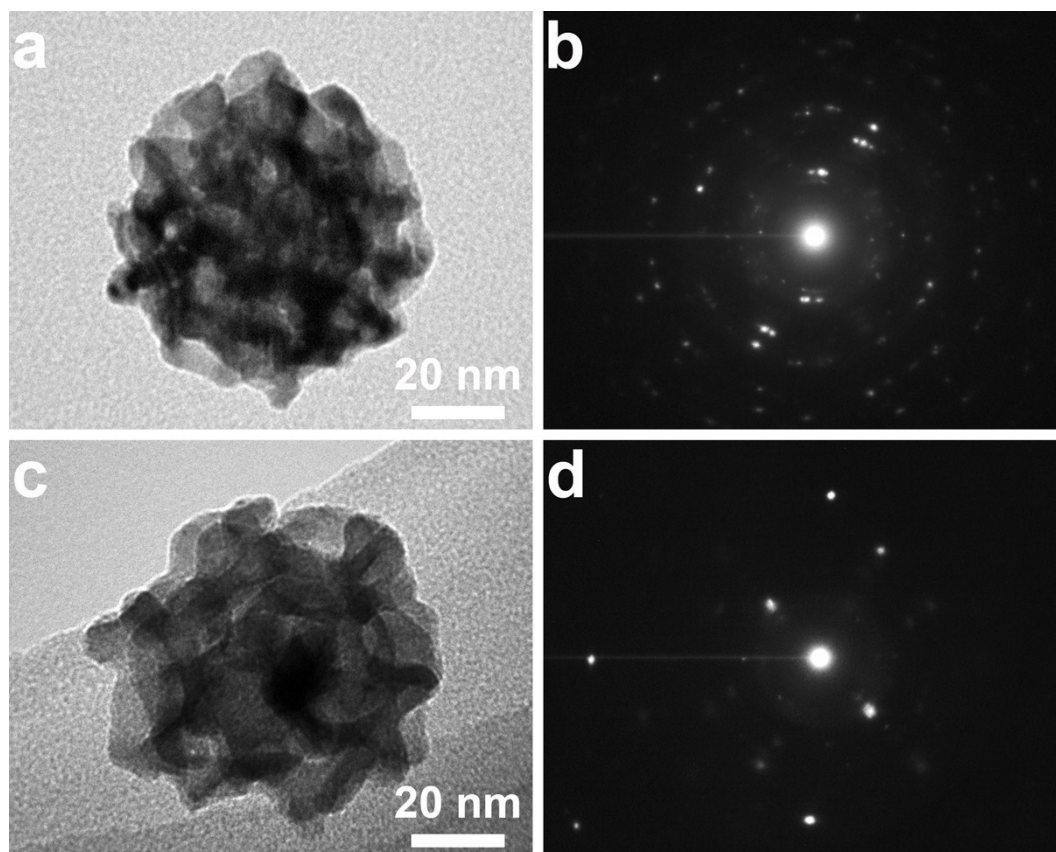

**Figure S3.** (a, c) Typical TEM images and (b, d) the corresponding SAED patterns of one individual meso-PdNP-4% illuminating the high crystallinity.

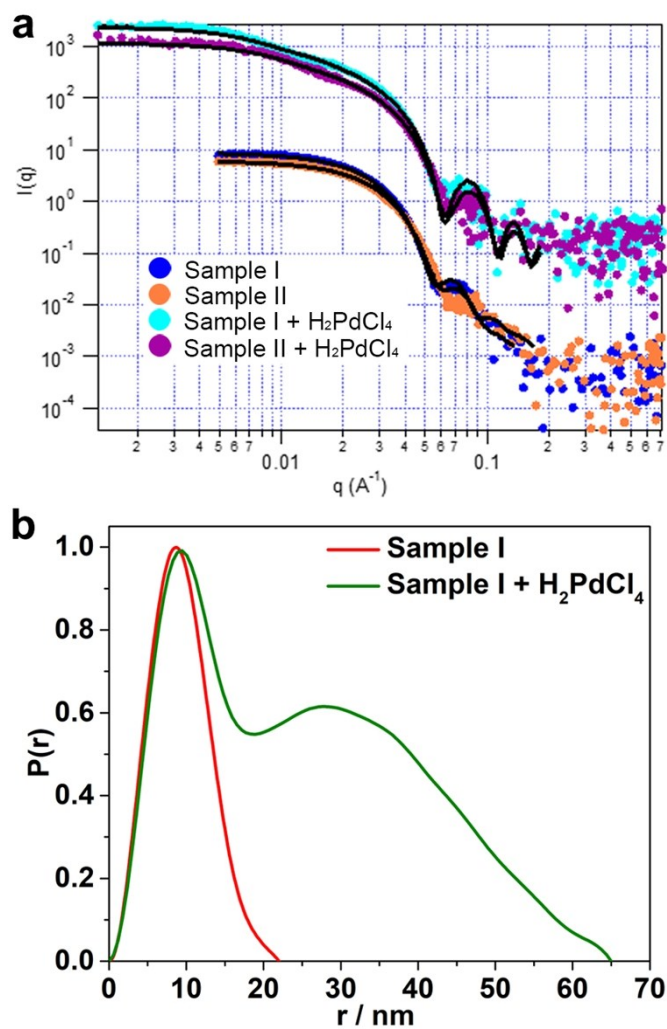

**Figure S4.** (a) Small angle neutron scattering data for polymeric micelles by dissolving PS-*b*-PEO in 4%THF/D<sub>2</sub>O (Sample I), 9%THF/D<sub>2</sub>O (Sample II), Sample I + H<sub>2</sub>PdCl<sub>4</sub>, and Sample II + H<sub>2</sub>PdCl<sub>4</sub>, respectively. Fits to the data represent a polydisperse core-shell model for Samples I and II without H<sub>2</sub>PdCl<sub>4</sub> and a cylinder model of uniform scattering length density for Samples I and II with H<sub>2</sub>PdCl<sub>4</sub>. Further details about the models used to fit the data are given below **Table S1**. (b) The probability distribution functions extracted from the data, which are consistent with spherical shaped particles in solution for Sample I. Sample I + H<sub>2</sub>PdCl<sub>4</sub> shows that the polymer self-assembles into much larger structures in solution on addition of the metal precursor.

**Table S1.** Parameters extracted from fits to geometric shapes using NIST analysis macros in Igor Pro.

| Samples                                         | Radius <sup>c</sup> [Å] | Core radius <sup>d</sup> [Å] | Shell thickness <sup>d</sup> [Å] | Cylinder radius <sup>e</sup> [Å] | Cylinder length <sup>e</sup> [Å] |
|-------------------------------------------------|-------------------------|------------------------------|----------------------------------|----------------------------------|----------------------------------|
| Sample I <sup>a</sup>                           | 82.5 ± 0.1              | 44.1 ± 0.1                   | 40.2 ± 0.1                       |                                  |                                  |
| Sample II <sup>b</sup>                          | 78.6 ± 0.1              | 50.4 ± 0.1                   | 29.3 ± 0.1                       |                                  |                                  |
| Sample I +<br>H <sub>2</sub> PdCl <sub>4</sub>  |                         |                              |                                  | 63.0 ± 0.1                       | 690 ± 12                         |
| Sample II +<br>H <sub>2</sub> PdCl <sub>4</sub> |                         |                              |                                  | 61.7 ± 0.1                       | 547 ± 7                          |

<sup>a</sup>Sample I was prepared by dissolving 4 mg of PS-*b*-PEO in 0.08 mL THF and 1.92 mL D<sub>2</sub>O, *i.e.* 4%THF/D<sub>2</sub>O.

<sup>b</sup>Sample II was prepared by dissolving 4 mg of PS-*b*-PEO in 0.18 mL THF and 1.82 mL D<sub>2</sub>O, *i.e.* 9%THF/D<sub>2</sub>O.

<sup>c</sup>Data fit with a polydisperse sphere model of uniform scattering length density.

<sup>d</sup>Data fit with a polydisperse core-shell particle model with different scattering length densities for core and shell.

<sup>e</sup>Data fit with a cylinder model.

### Notes for Figure S4 and Table S1:

The simplest model that can adequately describe the scattering from Samples I and II is a polydisperse sphere model, which assumes a uniform scattering length density throughout the micelles. The single parameter extracted from such a model is the radius of the spheres, which is found to decrease from 82.5 Å to 78.6 Å on increasing the concentration of THF. Since PS-*b*-PEO assembled into a core-shell structure, a polydisperse core-shell model was then applied to model the difference between the PS core and the outer PEO shell and reasonable values for the core and shell were extracted from fits, although only a small improvement was seen in overall fit quality. The core radius was found to increase as expected when the amount of THF in the sample was increased. Once the metal precursor was added in solution, the SANS data showed that significantly larger micellar structures were present. The data were fitted with a cylinder model of uniform density as the simplest model that could describe the data. Other models such as a mix of cylinders and spheres were also found to give reasonable fits to the data (not shown).

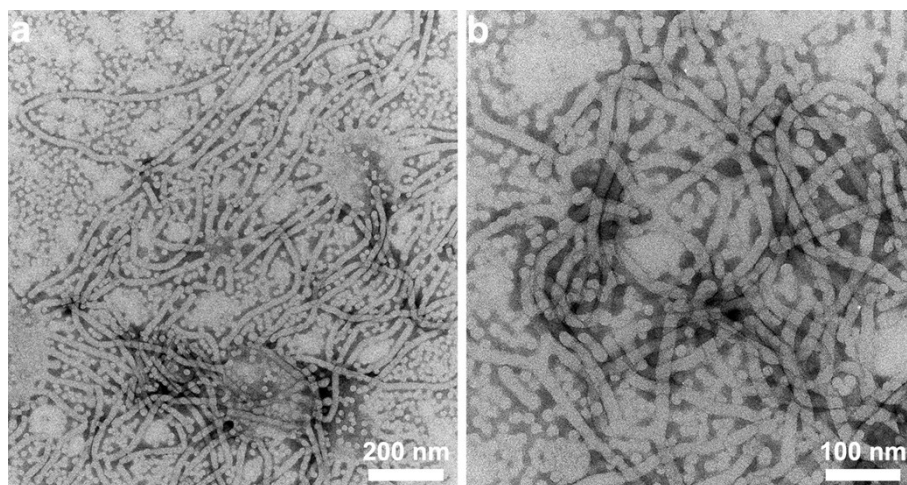

**Figure S5** a) Low- and b) high-magnification TEM images of the polymeric micelles formed by dissolving PS-*b*-PEO in H<sub>2</sub>O mixed with 12% THF without addition of H<sub>2</sub>PdCl<sub>4</sub>.

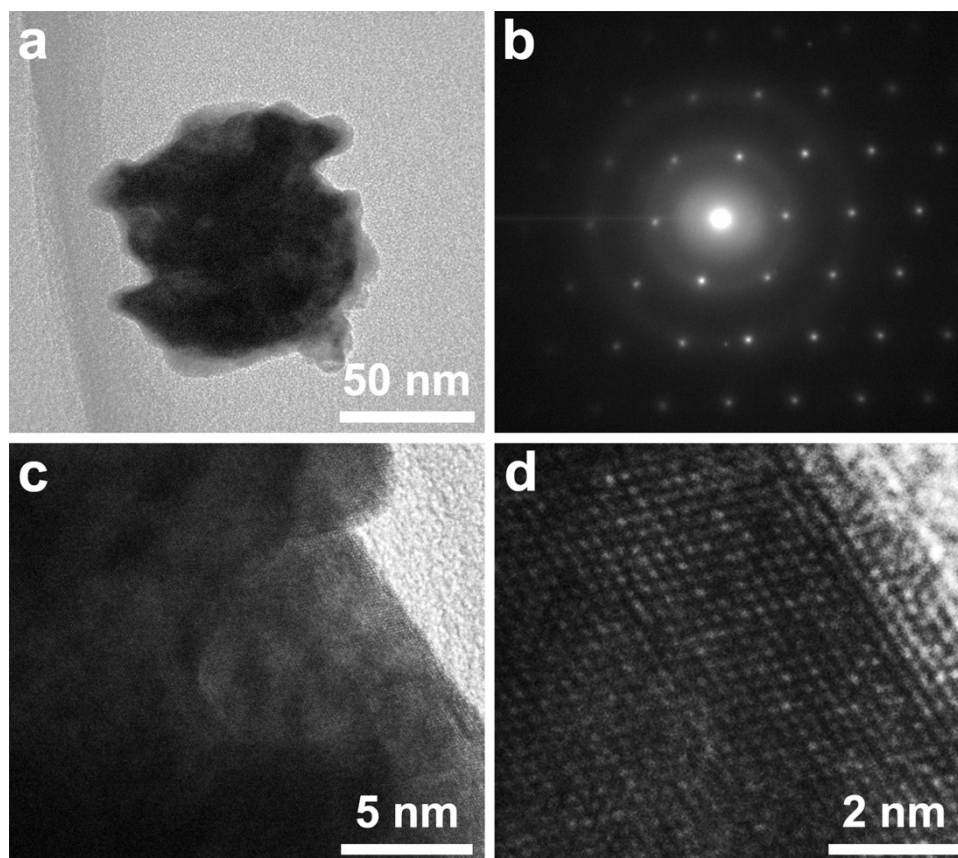

**Figure S6** a) TEM, and c,d) HRTEM images of the as-prepared meso-PdNPs-18%. Panel b) shows the SAED pattern of the single nanoparticle shown in panel a).

**Table S2.** Comparison of the EOR mass activity catalyzed by different Pd-based electrocatalysts.

| <b>Catalysts</b>                         | <b>Electrolyte</b>                                 | <b>Scan rate<br/>(mV s<sup>-1</sup>)</b> | <b>Mass activity<br/>(A mg<sup>-1</sup>_Pd)</b> | <b>References</b> |
|------------------------------------------|----------------------------------------------------|------------------------------------------|-------------------------------------------------|-------------------|
| Mesoporous Pd nanoparticles              | 1M NaOH + 1M<br>C <sub>2</sub> H <sub>5</sub> OH   | 50                                       | 4.78                                            | Present<br>work   |
| PdCo nanotube arrays                     | 1M NaOH + 1M<br>C <sub>2</sub> H <sub>5</sub> OH   | 50                                       | 1.50                                            | S1                |
| Ultrathin Pd nanomesh                    | 1M NaOH + 1M<br>C <sub>2</sub> H <sub>5</sub> OH   | 50                                       | 5.40                                            | S2                |
| PdAg bimetallic alloy<br>networks        | 1M NaOH + 1M<br>C <sub>2</sub> H <sub>5</sub> OH   | 50                                       | 1.97                                            | S3                |
| Ultrafine FePd nanoalloys-<br>MWCNTs     | 1M NaOH + 1M<br>C <sub>2</sub> H <sub>5</sub> OH   | 50                                       | 1.20                                            | S4                |
| Pd-Pt bimetallic<br>heterostructures     | 1M NaOH + 1M<br>C <sub>2</sub> H <sub>5</sub> OH   | 50                                       | 12.65                                           | S5                |
| Pd-CNTs                                  | 1M NaOH + 1M<br>C <sub>2</sub> H <sub>5</sub> OH   | 50                                       | 2.86                                            | S6                |
| Pd-Ni-P                                  | 1M NaOH + 1M<br>C <sub>2</sub> H <sub>5</sub> OH   | 50                                       | 4.95                                            | S7                |
| Flower-like PdAuCu-rGO-<br>CNT framework | 1M NaOH + 1M<br>C <sub>2</sub> H <sub>5</sub> OH   | 50                                       | 2.35                                            | S8                |
| PdPt bimetallic alloy<br>nanowires       | 0.1M NaOH + 1M<br>C <sub>2</sub> H <sub>5</sub> OH | 50                                       | ~0.9                                            | S9                |
| Pd-Ni-P electrocatalysts                 | 0.1M NaOH + 1M<br>C <sub>2</sub> H <sub>5</sub> OH | 10                                       | ~0.11                                           | S10               |



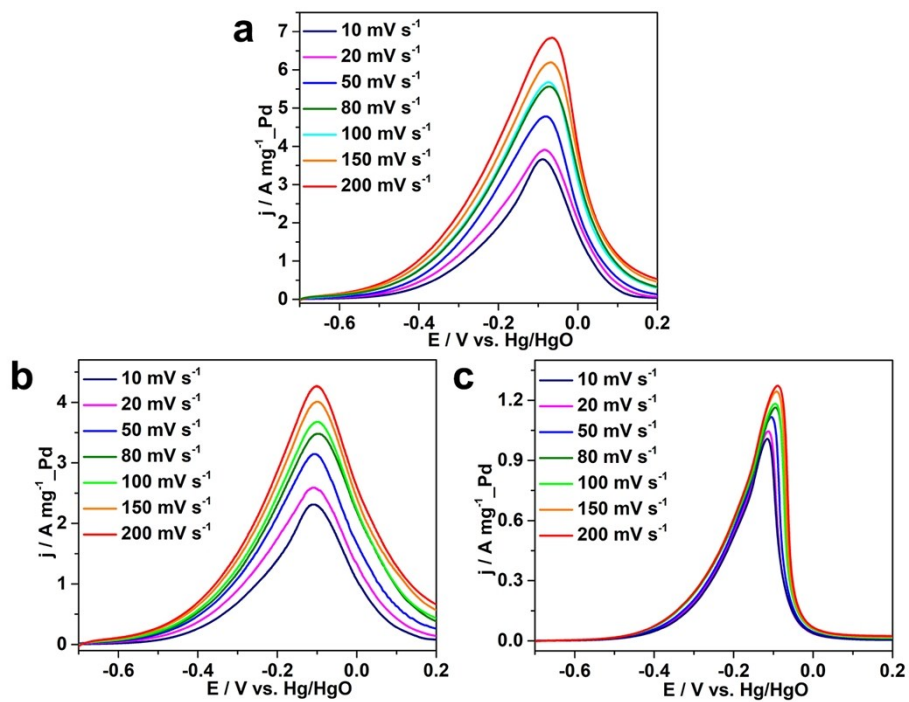

**Figure S7.** CVs of the EOR catalyzed by a) meso-PdNPs-4%, b) meso-PdNPs-12%, and c) PdB in 1.0 M NaOH containing 1.0 M C<sub>2</sub>H<sub>5</sub>OH at different scan rates.

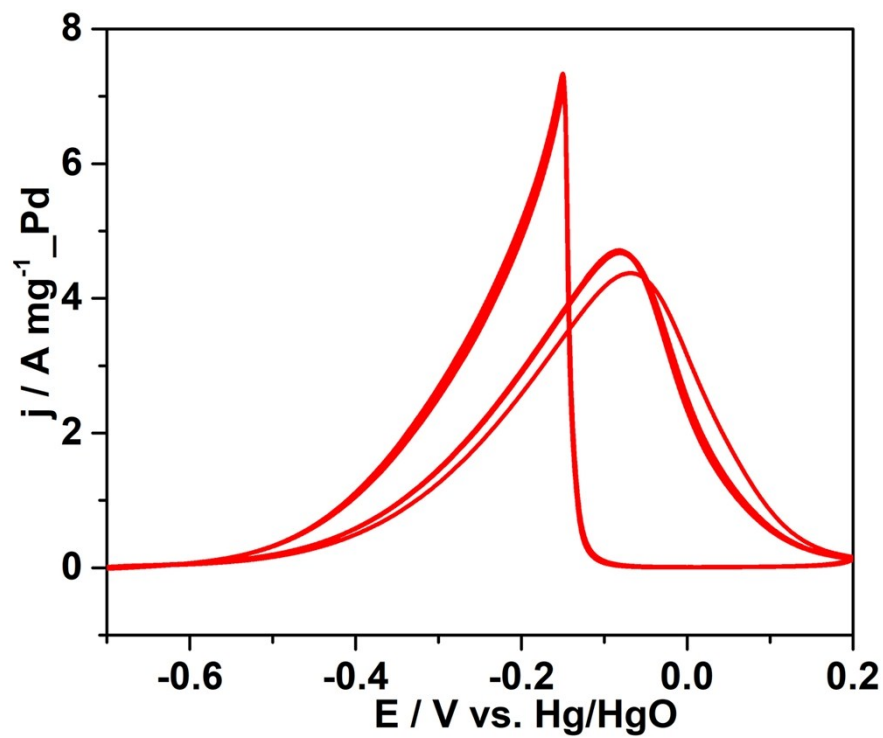

**Figure S8.** Typical CV curves (10 successive cycles) of EOR catalyzed by meso-PdNPs-4% in 1.0 M NaOH containing 1.0 M  $\text{C}_2\text{H}_5\text{OH}$  after durability test for 2 h.

## References

- [S1] A.-L. Wang, X.-J. He, X.-F. Lu, H. Xu, Y.-X. Tong, G.-R. Li, *Angew. Chem. Int. Ed.* **2015**, 54, 3669-3673.
- [S2] J. Ge, P. Wei, G. Wu, Y. Liu, T. Yuan, Z. Li, Y. Qu, Y. Wu, H. Li, Z. Zhuang, X. Hong, Y. Li, *Angew. Chem. Int. Ed.* **2018**, 57, 3435-3438.
- [S3] S. Fu, C. Zhu, D. Du, Y. Lin, *ACS Appl. Mater. Interfaces* **2015**, 7, 13842-13848.
- [S4] Y. Wang, Q. He, J. Guo, J. Wang, Z. Luo, T. D. Shen, K. Ding, A. Khasanov, S. Wei, Z. Guo, *ACS Appl. Mater. Interfaces* **2015**, 7, 23920-23931.
- [S5] J. Fan, K. Qi, L. Zhang, H. Zhang, S. Yu, X. Cui, *ACS Appl. Mater. Interfaces* **2017**, 9, 18008-18014.
- [S6] J. Zhang, Y. Cheng, S. Lu, L. Jia, P. K. Shen, S. P. Jiang, *Chem. Commun.* **2014**, 50, 13732-13734.
- [S7] L. Chen, L. Lu, H. Zhu, Y. Chen, Y. Huang, Y. Li, L. Wang, *Nat. Commun.* **2017**, 8, 14136.
- [S8] M. Wang, Z. Ma, R. Li, B. Tang, X.-Q. Bao, Z. Zhang, X. Wang, *Electrochim. Acta* **2017**, 227, 330-344.
- [S9] C. Zhu, S. Guo, S. Dong, *Adv. Mater.* **2012**, 24, 2326-2331.
- [S10] R. Jiang, D. T. Tran, J. P. McClure, D. Chu, *ACS Catal.* **2014**, 4, 2577-2586.
